# Supplementary material for: Mellitate-based coordination polymers with a recurring motif: controlling dimensionality with secondary ligands
Source: Royal Society of Chemistry journal article supplement (doi:10.1039/c3ce40442k), 2013-01-01
Supplement: c3ce40442k.pdf [file c3ce40442k.pdf]

## Supporting Information

### Mellitate-Based Coordination Polymers with a Recurring Motif: Controlling Dimensionality with Secondary Ligands

Meng-Yuan Li and Slavi C. Sevov\*

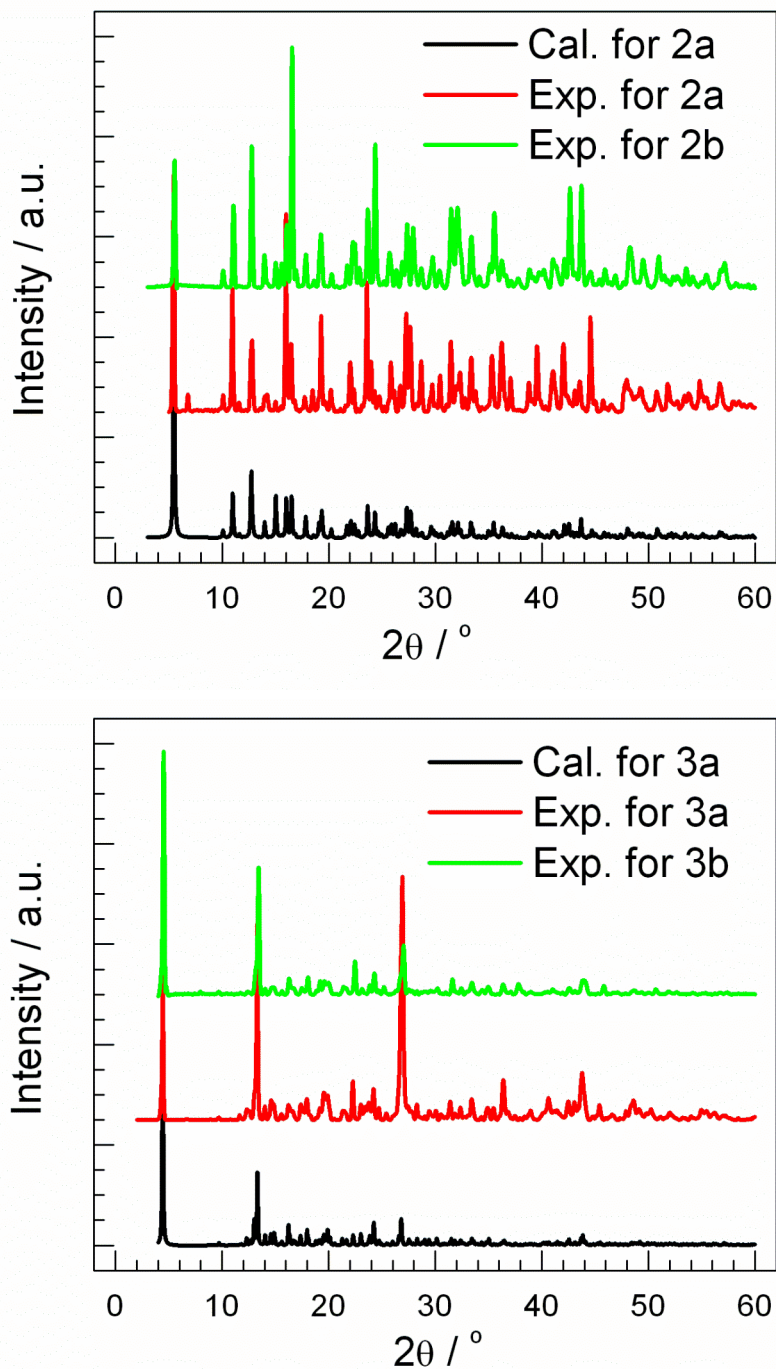

**Figure S1.** Calculated and experimental PXRD patterns for compounds **2a**, **2b**, **3a**, and **3b**

## Supporting Information

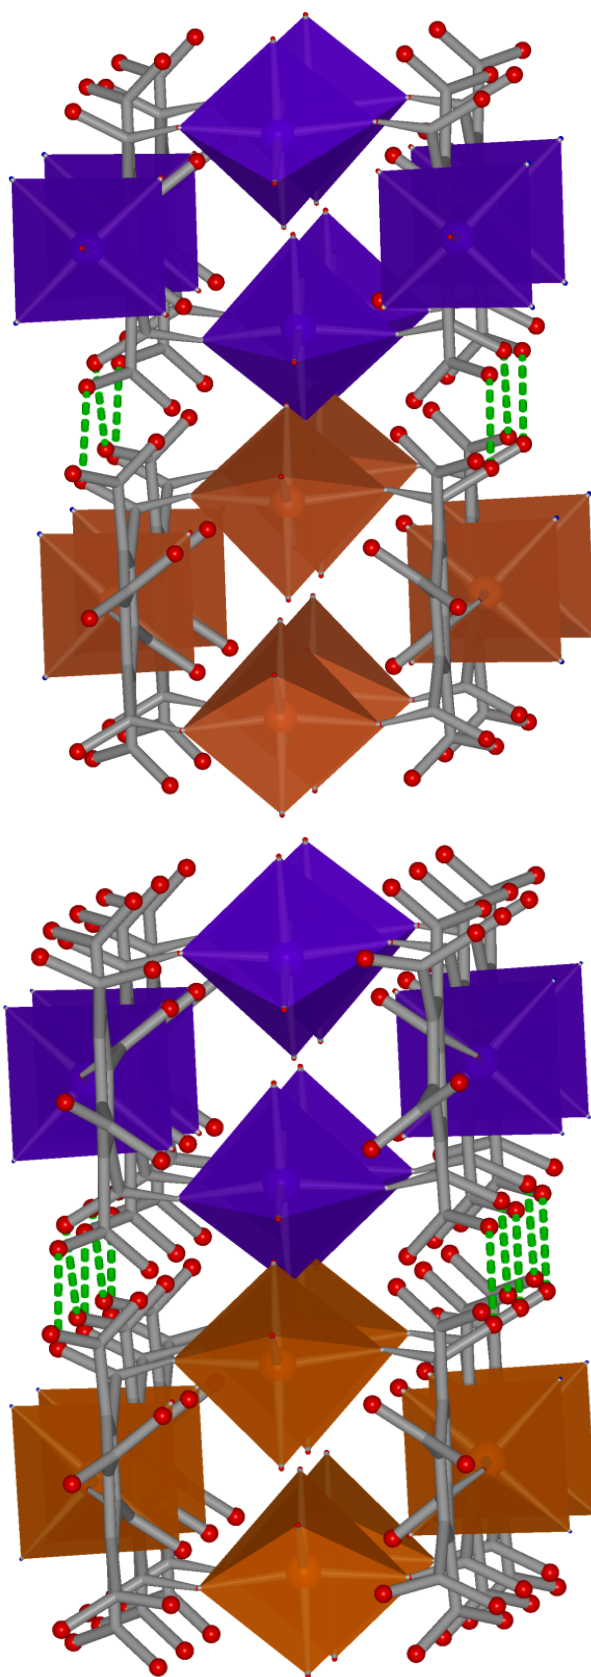

**Figure S2.** Hydrogen bonds between the 1D-SBUs in compounds **2** (top) and **3** (bottom).

## Supporting Information

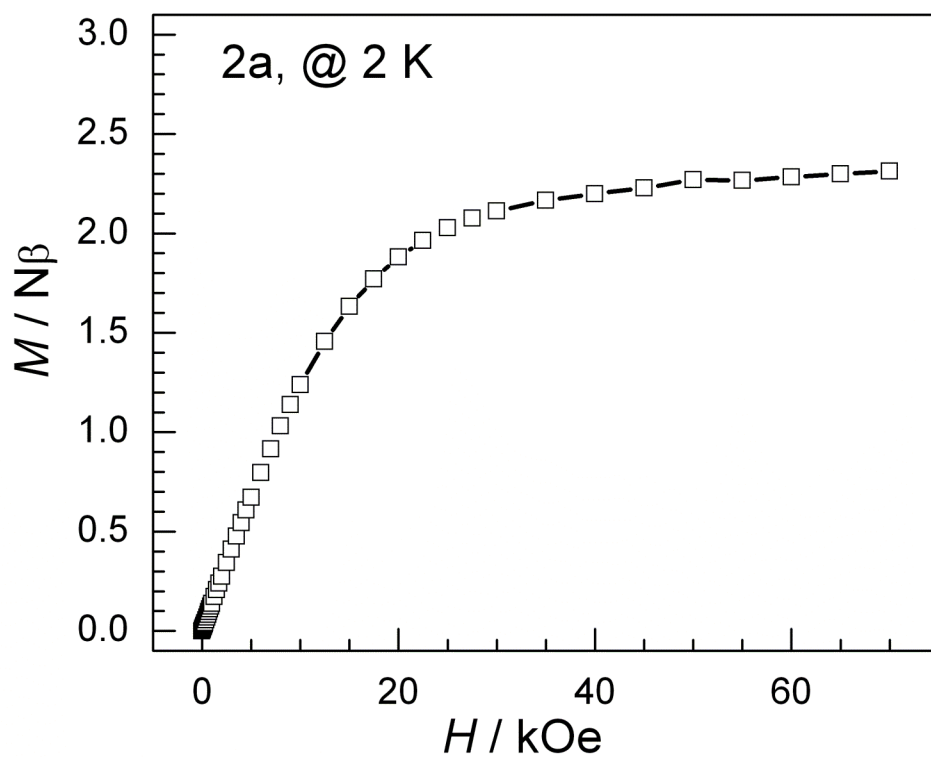

**Figure S3.** Magnetization vs.  $H$  at 2 K for **2a**.

## Supporting Information

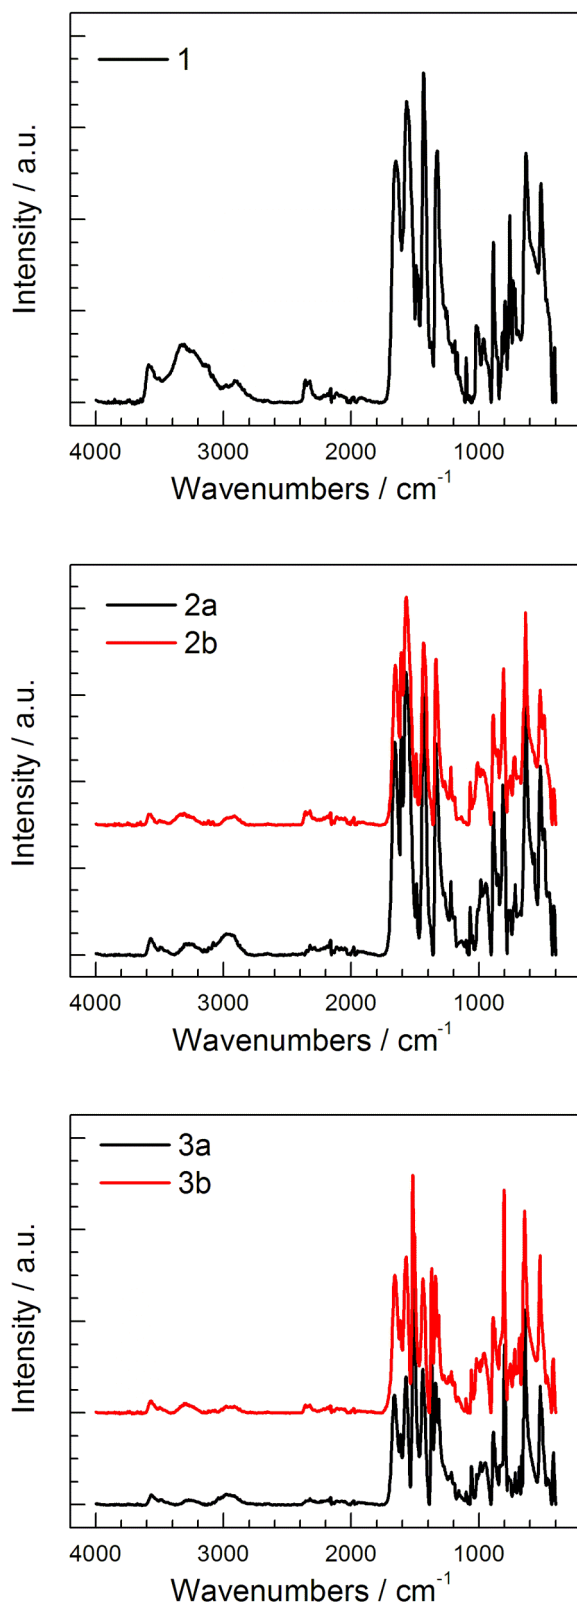

**Figure S4.** The IR spectra of the five compounds
